# Supplementary material for: Room-Temperature Fabrication of a Nickel-Functionalized Copper Metal–Organic Framework (Ni@Cu-MOF) as a New Pseudocapacitive Material for Asymmetric Supercapacitors
Source: MDPI journal article supplement (doi:10.3390/polym11050821), 2019-05-07
Supplement: s1 [file s1]

Room temperature fabrication of nickel functionalized copper metal-organic framework (Ni@Cu-MOF) nanosheets as new pseudocapacitive material for asymmetric supercapacitor  
Yi Wang<sup>a</sup>, Shengqiang Nie<sup>a</sup>, Yuan Liu<sup>a</sup>, Wei Yan<sup>a</sup>, Gang cheng<sup>a</sup>, Shaomin Lin<sup>b</sup>, Huan Yang<sup>b\*</sup> and Jun Luo<sup>a\*</sup>

<sup>a</sup> College of Chemistry and Material Engineering, Gui Yang University, Guiyang, 550005, PR China

<sup>b</sup> School of Material Science and Engineering Han Shan Normal University, Chaozhou, 521041, P.R. China.

### **Electrochemical study in a three-electrode system.**

The capacitance can be calculated according to following eqn (1): [1]

$$C = (I\Delta t)/(m\Delta V) \quad (1)$$

where  $C$  ( $F\ g^{-1}$ ) is the capacitance,  $\Delta V$  is the potential range (V),  $I$  is the discharge current (A)

and  $\Delta t$  represent the discharge time (s).

### **Electrochemical study in a two-electrode system.**

A simple ASC was based on Ni@Cu-MOF (positive electrode) and activated carbon (negative electrode), respectively. The specific capacitance of Ni@Cu-MOF and AC are deduced from the galvanostatic discharge experiments in two-electrode system.

The weight of the active materials was determined according to the following equation: [43]

$$m^+ / m^- = C^- V^- / C^+ V^+ \quad (2)$$

where  $C$ ,  $m$ ,  $V$  are the capacitance, the mass loading, the potential window, respectively. The energy density ( $E$ , Wh/kg) and power density ( $P$ , W /kg) of the ASC were determined according to the following equations. [43]

$$E = (C\Delta V^2)/2 \times 3.6 \quad (3)$$

$$P = 3600E/\Delta t \quad (4)$$

where  $C$ ,  $\Delta V$  and  $\Delta t$  the specific capacitance of asymmetric supercapacitor, the potential window and the discharge time.

### **Preparation of electrode**

The working electrodes were prepared by dispersing the active electrode material (Cu-MOF or Ni@Cu-MOF) (80%), acetylene black (10%) as conductive agent and polyvinylidene fluoride (PVDF) (10%) as a binder in N-methyl-2-pyrrolidinone (NMP). The slurry was pasted on Ni foam ( $1\ cm^2$  area and 1 mm thick) and dried at 60 °C overnight in the air. Pt plate and Hg/HgO were as the counter electrode and reference electrode, respectively.

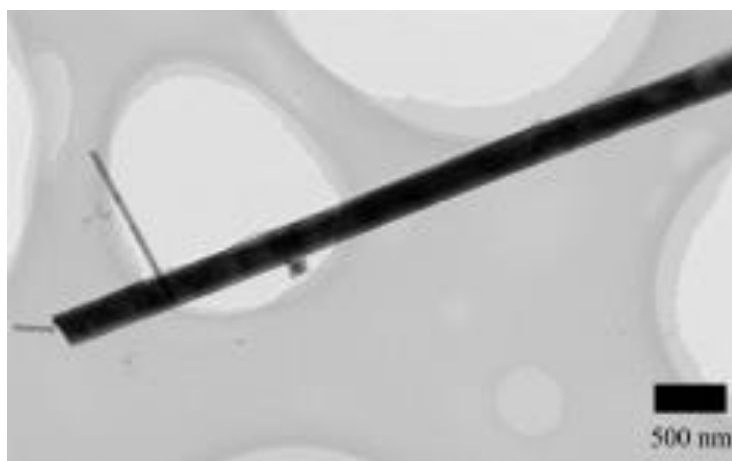

Figure S1 TEM of Cu-MOF

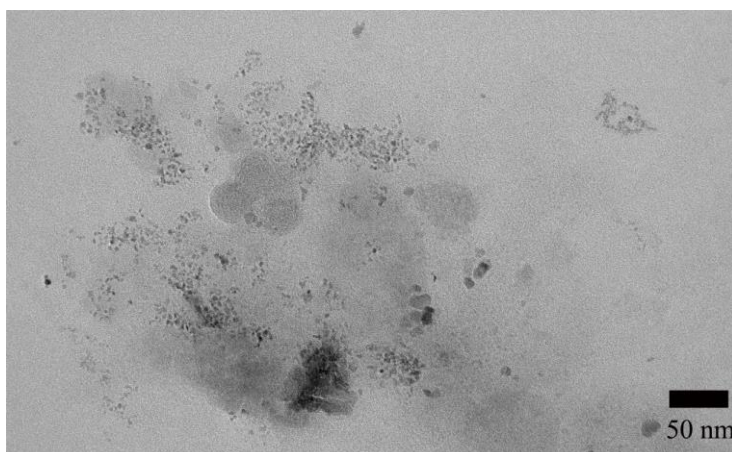

Figure S2 TEM of Cu-MOF

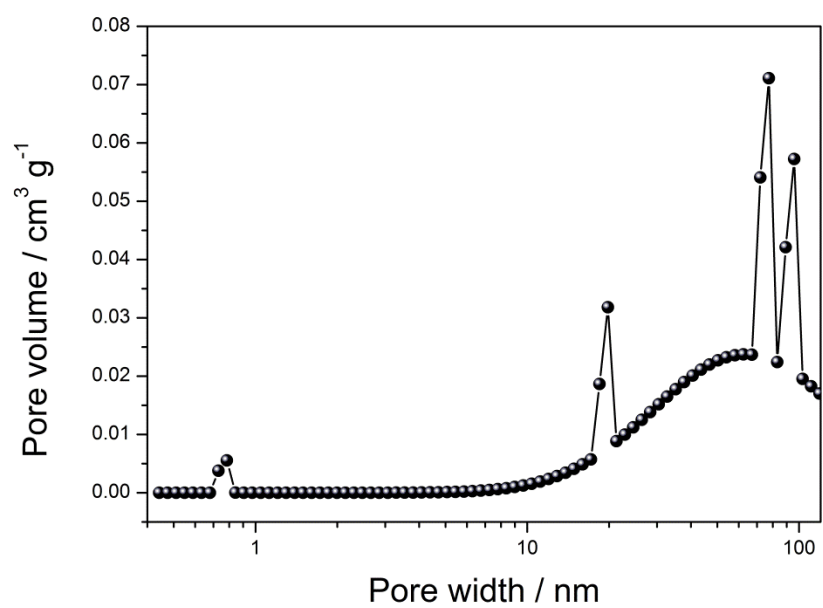

Figure S3 Pore-size distribution of Cu-MOF

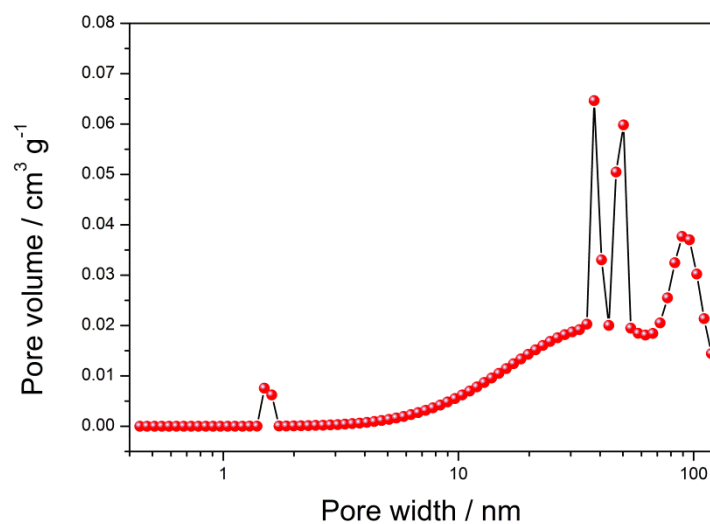

Figure S4 Pore-size distribution of Ni@Cu-MOF

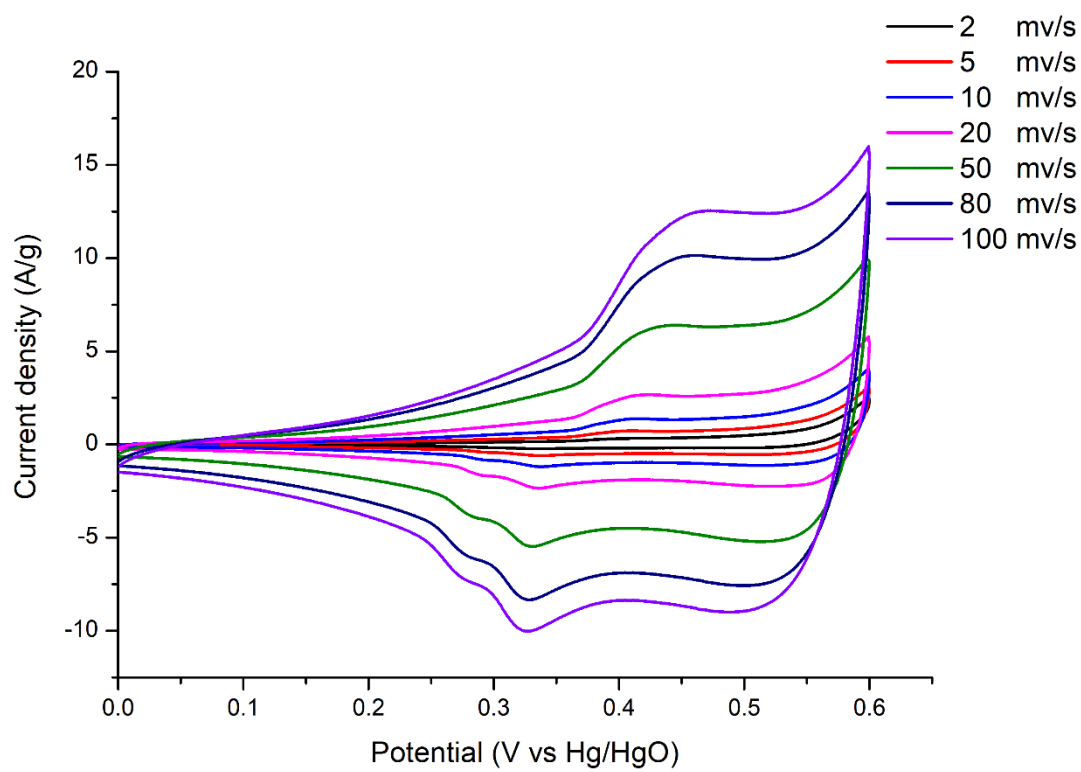

Figure S5. CV curves of Cu-MOF at scan rates 2, 5, 8, 10, 20, 50, 80, 100  $\text{mV s}^{-1}$

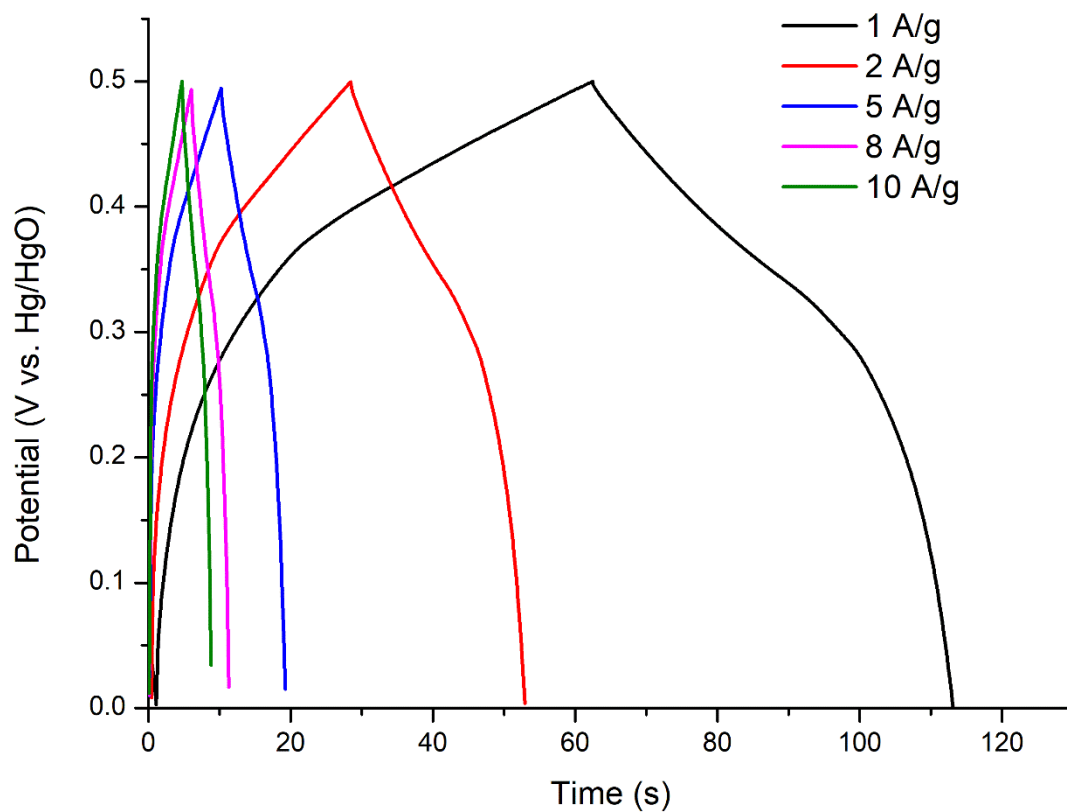

Figure S6. Galvanostatic charge/discharge curves of Cu-MOF at different current densities.

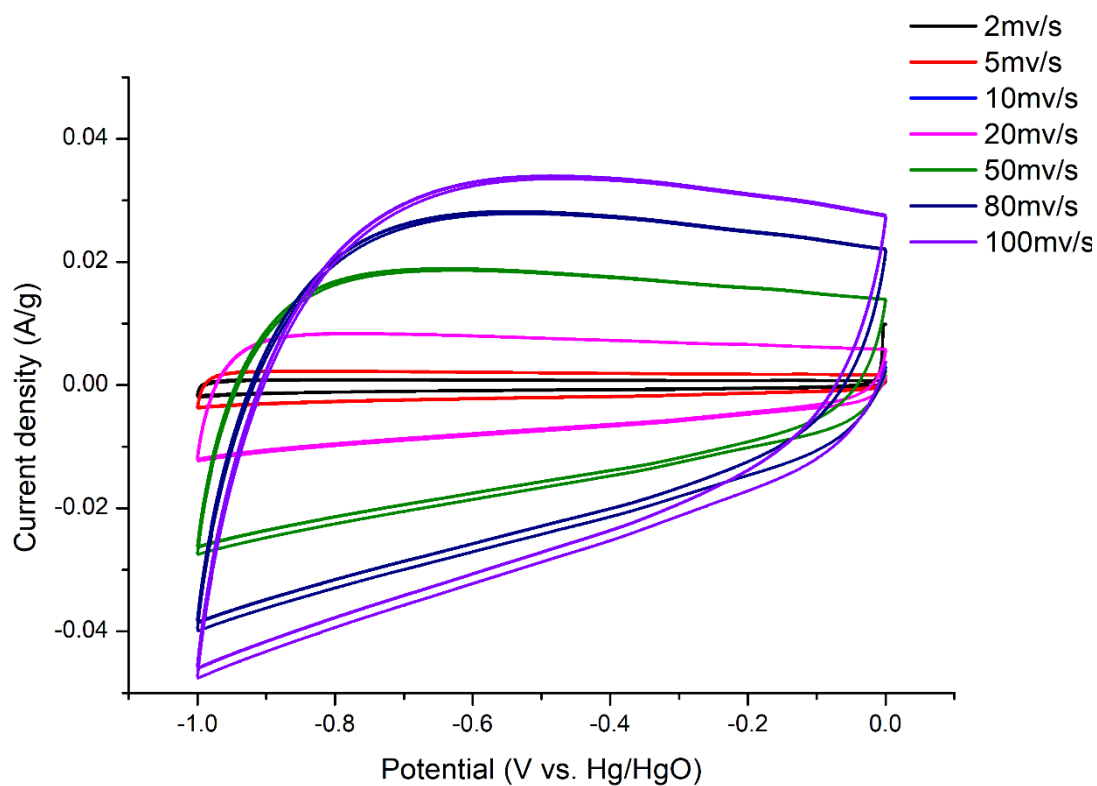

Figure S7. CV curves of activated carbon at scan rates 2, 5, 8, 10, 20, 50, 80, 100  $\text{mV s}^{-1}$

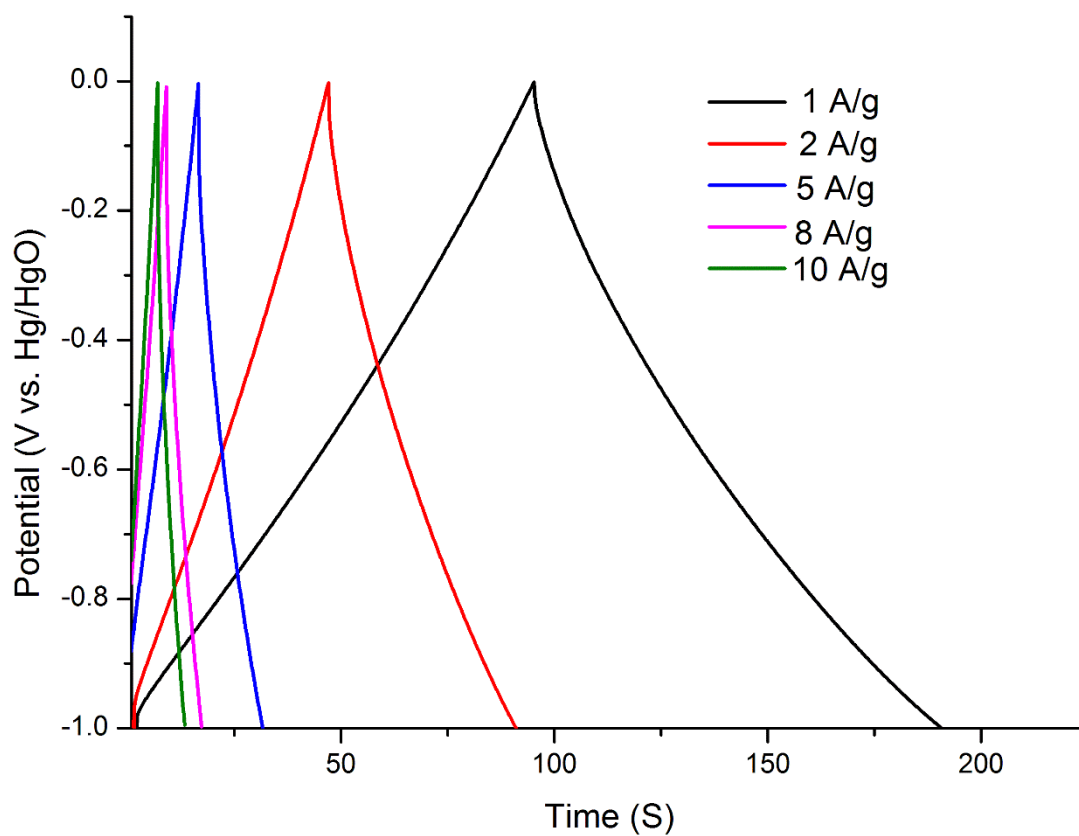

**Figure S8. Galvanostatic charge/discharge curves of activated carbon at different current densities.**

## References

1. S. Z., Li D. H. , Chen S. , Yang X. F. , Zhao X. L. , Zhao Q. S. , Komarneni S. , Yang D. J. Highly Stable Supercapacitors with MOF-derived Co<sub>9</sub>S<sub>8</sub>/Carbon Electrodes for High Rate Electrochemical Energy Storage. *J. Mater. Chem. A*, 2017, 5, 12453-12461.
